# Supplementary material for: Liquid–liquid phase separation in organic particles consisting of α-pinene and β-caryophyllene ozonolysis products and mixtures with commercially-available organic compounds
Source: Copernicus journal article supplement (doi:10.5194/acp-2020-318), 2020-04-09
Supplement: Supplementary file 1 [file SI_acp-2020-318.pdf › SI_acp-2020-318.pdf]

*Supplementary of*

**Liquid–liquid phase separation in organic particles consisting of  $\alpha$ -  
pinene and  $\beta$ -caryophyllene ozonolysis products and mixtures with  
5 highly oxidized organic compounds**

**Young-Chul Song et al.,**

Correspondence to: Mijung Song ([mijung.song@jbnu.ac.kr](mailto:mijung.song@jbnu.ac.kr))

10 **S1. Liquid-liquid phase separation in one and two organic species**

Table S1. Summary of lower RH boundary for LLPS (LLPS<sub>lower</sub>) and upper RH boundary for LLPS (LLPS<sub>upper</sub>) for particles of one organic species with decreasing and increasing RH in this work. Uncertainties represent 2σ of multiple measurements and the uncertainty from the calibration.

15

| Compounds                             | O:C  | Increasing RH         |                       | Decreasing RH         |                       |
|---------------------------------------|------|-----------------------|-----------------------|-----------------------|-----------------------|
|                                       |      | LLPS <sub>lower</sub> | LLPS <sub>upper</sub> | LLPS <sub>lower</sub> | LLPS <sub>upper</sub> |
| β-caryophyllene aldehyde              | 0.13 | 96.1±2.2%             | 100±1.5%              | 94.1±1.9%             | 100±1.5%              |
| β-caryophyllonic acid                 | 0.20 | 94.9±2.3%             | 100±1.5%              | 95.8±2.6%             | 100±1.5%              |
| Pinonaldehyde                         | 0.20 | 93.0±1.9%             | 100±1.5%              | 94.0±1.7%             | 100±1.5%              |
| β-nocaryophyllene aldehyde            | 0.21 | 93.8±2.7%             | 100±1.5%              | 94.7±2.6%             | 100±1.5%              |
| β-nocaryophyllonic acid               | 0.29 | 92.1±1.6%             | 100±1.5%              | 95.7±1.7%             | 100±1.5%              |
| β-caryophyllinic acid                 | 0.29 | 81.1±3.2%             | 100±1.5%              | 84.6±2.1%             | 100±1.5%              |
| Pinic acid                            | 0.44 | 95.4±1.9%             | 100±1.5%              | 96.8±1.6%             | 100±1.5%              |
| suberic acid monomethyl ester*        | 0.44 | 97.8±2.5%             | 100±1.5%              | 98.1±2.2%             | 100±1.5%              |
| Polyethylene glycol-400<br>(PEG-400)* | 0.56 | No LLPS               |                       | No LLPS               |                       |
| Diethyl L-tartrate*                   | 0.75 | No LLPS               |                       | No LLPS               |                       |
| Pyruvic acid                          | 1.00 | No LLPS               |                       | No LLPS               |                       |

\*This result is consistent with a previous study of Song et al. (2018).

Table S2. Summary of lower RH boundary for LLPS (LLPS<sub>lower</sub>) and upper RH boundary for LLPS (LLPS<sub>upper</sub>) for particles of two organic species with decreasing and increasing RH in this work.

20 Uncertainties represent 2 $\sigma$  of multiple measurements and the uncertainty from the calibration.

| Mixtures                                                               | Average<br>O:C | $\Delta$ O:C | Increasing RH                |                              | Decreasing RH                |                              |
|------------------------------------------------------------------------|----------------|--------------|------------------------------|------------------------------|------------------------------|------------------------------|
|                                                                        |                |              | LLPS <sub>lower</sub><br>(%) | LLPS <sub>upper</sub><br>(%) | LLPS <sub>lower</sub><br>(%) | LLPS <sub>upper</sub><br>(%) |
| $\beta$ -caryophyllene aldehyde /<br>$\beta$ -caryophyllonic acid      | 0.16           | 0.07         | 95.0 $\pm$ 2.4%              | 100 $\pm$ 1.5%               | 93.3 $\pm$ 2.4%              | 100 $\pm$ 1.5%               |
| $\beta$ -caryophyllene aldehyde /<br>$\beta$ -nocaryophyllene aldehyde | 0.17           | 0.08         | 92.5 $\pm$ 1.6%              | 100 $\pm$ 1.5%               | 91.3 $\pm$ 1.6%              | 100 $\pm$ 1.5%               |
| $\beta$ -caryophyllene aldehyde /<br>$\beta$ -nocaryophyllonic acid    | 0.20           | 0.16         | 93.1 $\pm$ 1.7%              | 100 $\pm$ 1.5%               | 91.4 $\pm$ 1.9%              | 100 $\pm$ 1.5%               |
| $\beta$ -caryophyllonic acid /<br>$\beta$ -nocaryophyllene aldehyde    | 0.21           | 0.01         | 96.4 $\pm$ 2.1%              | 100 $\pm$ 1.5%               | 95.6 $\pm$ 2.1%              | 100 $\pm$ 1.5%               |
| $\beta$ -caryophyllonic acid /<br>$\beta$ -nocaryophyllonic acid       | 0.24           | 0.09         | 94.9 $\pm$ 1.6%              | 100 $\pm$ 1.5%               | 93.7 $\pm$ 1.6%              | 100 $\pm$ 1.5%               |
| $\beta$ -nocaryophyllonic acid /<br>$\beta$ -nocaryophyllene aldehyde  | 0.25           | 0.08         | 94.3 $\pm$ 1.8%              | 100 $\pm$ 1.5%               | 92.0 $\pm$ 2.0%              | 100 $\pm$ 1.5%               |
| $\beta$ -caryophyllene aldehyde /<br>suberic acid monomethyl ester     | 0.26           | 0.31         | 96.1 $\pm$ 2.2%              | 100 $\pm$ 1.5%               | 95.2 $\pm$ 1.8%              | 100 $\pm$ 1.5%               |
| $\beta$ -caryophyllene aldehyde /<br>Polyethylene glycol-400           | 0.27           | 0.43         | 41.5 $\pm$ 1.9%              | 100 $\pm$ 1.5%               | 39.6 $\pm$ 2.3%              | 100 $\pm$ 1.5%               |
| $\beta$ -caryophyllonic acid /<br>suberic acid monomethyl ester        | 0.30           | 0.24         | 94.0 $\pm$ 1.9%              | 100 $\pm$ 1.5%               | 92.1 $\pm$ 1.8%              | 100 $\pm$ 1.5%               |
| $\beta$ -nocaryophyllene aldehyde /<br>suberic acid monomethyl ester   | 0.31           | 0.35         | 94.1 $\pm$ 1.9%              | 100 $\pm$ 1.5%               | 94.1 $\pm$ 1.8%              | 100 $\pm$ 1.5%               |
| $\beta$ -nocaryophyllonic acid /<br>suberic acid monomethyl ester      | 0.35           | 0.27         | 95.6 $\pm$ 1.5%              | 100 $\pm$ 1.5%               | 94.2 $\pm$ 1.7%              | 100 $\pm$ 1.5%               |
| $\beta$ -caryophyllonic acid /<br>Polyethylene glycol-400              | 0.35           | 0.36         | 82.7 $\pm$ 2.5%              | 100 $\pm$ 1.5%               | 82.4 $\pm$ 2.7%              | 100 $\pm$ 1.5%               |
| $\beta$ -nocaryophyllene aldehyde /<br>Polyethylene glycol-400         | 0.36           | 0.35         | 86.8 $\pm$ 2.2%              | 100 $\pm$ 1.5%               | 86.5 $\pm$ 1.7%              | 100 $\pm$ 1.5%               |

| Mixtures                                             | Average<br>O:C | ΔO:C | Increasing RH                |                              | Decreasing RH                |                              |
|------------------------------------------------------|----------------|------|------------------------------|------------------------------|------------------------------|------------------------------|
|                                                      |                |      | LLPS <sub>lower</sub><br>(%) | LLPS <sub>upper</sub><br>(%) | LLPS <sub>lower</sub><br>(%) | LLPS <sub>upper</sub><br>(%) |
| β-caryophyllene aldehyde /<br>Diethyl L-tartrate     | 0.36           | 0.62 | 80.1±2.2%                    | 100±1.5%                     | 81.1±2.8%                    | 100±1.5%                     |
| β-nocaryophyllonic acid /<br>Polyethylene glycol-400 | 0.41           | 0.27 | 87.7±3.0%                    | 100±1.5%                     | 87.3±2.7%                    | 100±1.5%                     |
| β-caryophyllonic acid /<br>Diethyl L-tartrate        | 0.42           | 0.55 | 92.5±2.8%                    | 100±1.5%                     | 90.7±2.7%                    | 100±1.5%                     |
| β-nocaryophyllene aldehyde /<br>Diethyl L-tartrate   | 0.43           | 0.54 | 89.8±2.8%                    | 100±1.5%                     | 90.2±2.2%                    | 100±1.5%                     |
| β-caryophyllene aldehyde /<br>Pyruvic acid           | 0.44           | 0.87 | 67.1± 2.7%                   | 100±1.5%                     | 63.1± 2.9%                   | 100±1.5%                     |
| β-nocaryophyllonic acid /<br>Diethyl L-tartrate      | 0.48           | 0.46 | 93.1±1.5%                    | 100±1.5%                     | 92.2±2.5%                    | 100±1.5%                     |
| β-caryophyllonic acid /<br>Pyruvic acid              | 0.49           | 0.8  | 70.5± 2.2%                   | 100±1.5%                     | 70.1±1.5%                    | 100±1.5%                     |
| β-nocaryophyllene aldehyde /<br>Pyruvic acid         | 0.50           | 0.79 | 67.1± 2.8%                   | 100±1.5%                     | 63.0± 2.9%                   | 100±1.5%                     |
| β-nocaryophyllonic acid /<br>Pyruvic acid            | 0.56           | 0.44 | 86.1±1.7%                    | 100±1.5%                     | 86.0±2.8%                    | 100±1.5%                     |
| suberic acid monomethyl ester<br>/ Pyruvic acid      | 0.67           | 0.56 | 87.2±2.8%                    | 100±1.5%                     | 86.5±1.9%                    | 100±1.5%                     |
| Polyethylene glycol-400 /<br>Pyruvic acid            | 0.75           | 0.44 | No LLPS                      |                              | No LLPS                      |                              |
| Diethyl L-tartrate / Pyruvic<br>acid                 | 0.87           | 0.25 | No LLPS                      |                              | No LLPS                      |                              |

## S2. Parameterization of relative humidity of liquid-liquid phase separation

Parameterization of the LLPS<sub>lower</sub> and LLPS<sub>upper</sub> as a function of O:C ( $0.0 \leq \text{O:C} < 0.68$ ) was obtained using Sigmoidal–Boltzmann curve fits to data from Song et al. (2018) and this study at  $291 \pm 1\text{K}$  (Fig. 3b).

$$\text{RH of LLPS}_{\text{lower}} (\%) = (-17.2) + \left( \frac{105.8}{1 + \exp\left(\frac{(\text{the O:C ratio}) - 0.68}{dx}\right)} \right)$$

$$\text{RH of LLPS}_{\text{upper}} (\%) = \left( \frac{100}{1 + \exp\left(\frac{(\text{the O:C ratio}) - 0.68}{dx}\right)} \right)$$

## References

Song, M., Ham, S., Andrews, R. J., You, Y. and Bertram, A. K.: Liquid-liquid phase separation in organic particles containing one and two organic species: importance of the average O:C, Atmos. Chem. Phys., doi:10.5194/acp-18-12075-2018, 2018.
